# Supplementary material for: No Clear Clustering Dysbiosis from Salivary Microbiota Analysis by Long Sequencing Reads in Patients Affected by Oral Squamous Cell Carcinoma: A Single Center Study
Source: MDPI journal article supplement (doi:10.3390/cancers15174211), 2023-08-22

Supplementary Materials

**Supplementary Figure 1.** Absolute frequencies of organism classes over patients.

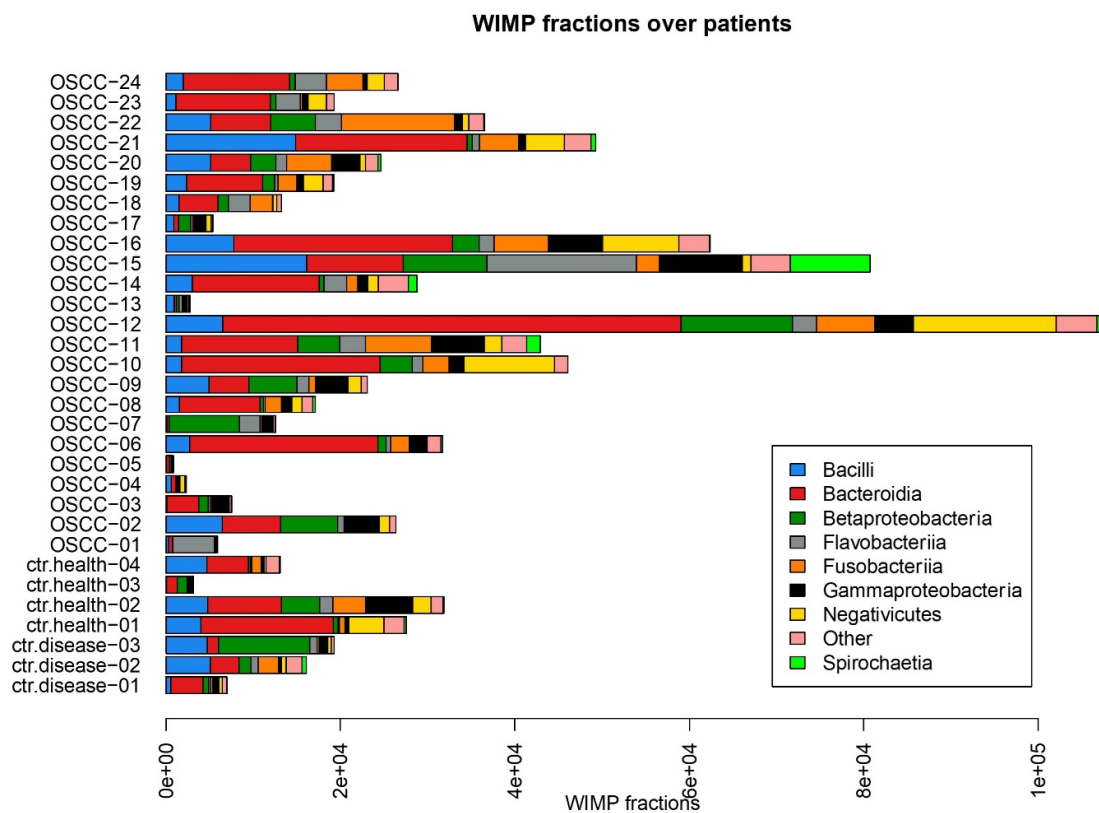

**Supplementary Table 1.** Comparison of average absolute frequencies between test and control groups (control =disease + health).

|    | organism                  | average.test | average.control | logFC | pval   | adj.pval |
|----|---------------------------|--------------|-----------------|-------|--------|----------|
| 1  | Chlamydia                 | 1.46         | 0.29            | 2.35  | 0.0024 | 0.30     |
| 2  | Tissierella               | 109.62       | 21.29           | 2.36  | 0.0100 | 0.31     |
| 3  | Calothrix                 | 1.17         | 0.00            | Inf   | 0.0100 | 0.31     |
| 4  | Leotiomycetes             | 0.29         | 0.00            | Inf   | 0.0130 | 0.31     |
| 5  | Firmicutes                | 22.79        | 7.71            | 1.56  | 0.0150 | 0.31     |
| 6  | Zetaproteobacteria        | 0.29         | 0.00            | Inf   | 0.0150 | 0.31     |
| 7  | Nostoc                    | 2.50         | 0.71            | 1.81  | 0.0200 | 0.31     |
| 8  | Chondrocystis             | 0.29         | 0.00            | Inf   | 0.0240 | 0.31     |
| 9  | Bacteroidetes/Chlorobi    | 0.67         | 0.14            | 2.22  | 0.0270 | 0.31     |
| 10 | Saccharibacteria          | 0.00         | 0.71            | -Inf  | 0.0270 | 0.31     |
| 11 | Saccharomycetes           | 1.54         | 0.29            | 2.43  | 0.0280 | 0.31     |
| 12 | Dictyoglomia              | 0.29         | 0.00            | Inf   | 0.0320 | 0.33     |
| 13 | Insecta                   | 5.42         | 1.57            | 1.79  | 0.0380 | 0.35     |
| 14 | Synergistia               | 0.54         | 0.00            | Inf   | 0.0410 | 0.35     |
| 15 | Thermoplasmata            | 0.25         | 0.00            | Inf   | 0.0430 | 0.35     |
| 16 | Pseudanabaena             | 0.33         | 0.00            | Inf   | 0.0480 | 0.35     |
| 17 | Bacteroidetes             | 27.00        | 12.00           | 1.17  | 0.0610 | 0.35     |
| 18 | Rippkaea                  | 0.25         | 0.00            | Inf   | 0.0630 | 0.35     |
| 19 | Clostridia                | 351.71       | 145.86          | 1.27  | 0.0640 | 0.35     |
| 20 | Chitinophagia             | 15.71        | 7.29            | 1.11  | 0.0710 | 0.35     |
| 21 | Methanococci              | 0.83         | 0.29            | 1.54  | 0.0730 | 0.35     |
| 22 | Sphingobacteriia          | 24.54        | 11.29           | 1.12  | 0.0740 | 0.35     |
| 23 | Thermococci               | 0.88         | 0.29            | 1.61  | 0.0740 | 0.35     |
| 24 | Methanomicrobia           | 2.08         | 0.86            | 1.28  | 0.0760 | 0.35     |
| 25 | Gastropoda                | 0.38         | 0.00            | Inf   | 0.0780 | 0.35     |
| 26 | Anthozoa                  | 0.38         | 0.00            | Inf   | 0.0790 | 0.35     |
| 27 | Methanobacteria           | 1.50         | 0.57            | 1.39  | 0.0810 | 0.35     |
| 28 | Fusobacteriia             | 2711.25      | 1202.43         | 1.17  | 0.0830 | 0.35     |
| 29 | Mollicutes                | 40.38        | 15.71           | 1.36  | 0.0830 | 0.35     |
| 30 | Eurotiomycetes            | 0.29         | 0.00            | Inf   | 0.0860 | 0.35     |
| 31 | Bacteroidia               | 10587.96     | 5404.29         | 0.97  | 0.1000 | 0.36     |
| 32 | Erysipelotrichia          | 11.50        | 4.71            | 1.29  | 0.1000 | 0.36     |
| 33 | Ktedonobacteria           | 0.42         | 0.00            | Inf   | 0.1100 | 0.36     |
| 34 | Candidatus Saccharimonina | 106.75       | 28.57           | 1.90  | 0.1200 | 0.36     |
| 35 | Crinalium                 | 0.38         | 0.00            | Inf   | 0.1200 | 0.36     |
| 36 | Holophagae                | 0.21         | 0.00            | Inf   | 0.1200 | 0.36     |
| 37 | Cyanobium                 | 0.21         | 0.00            | Inf   | 0.1200 | 0.36     |
| 38 | Bacillus                  | 5.75         | 2.14            | 1.42  | 0.1300 | 0.36     |
| 39 | Microcystis               | 0.58         | 0.00            | Inf   | 0.1300 | 0.36     |
| 40 | Trichodesmium             | 0.25         | 0.00            | Inf   | 0.1300 | 0.36     |
| 41 | Candidatus Thermofonsia   | 0.21         | 0.00            | Inf   | 0.1300 | 0.36     |

Supplementary Figures 2a. Organism diversity indices over patients.

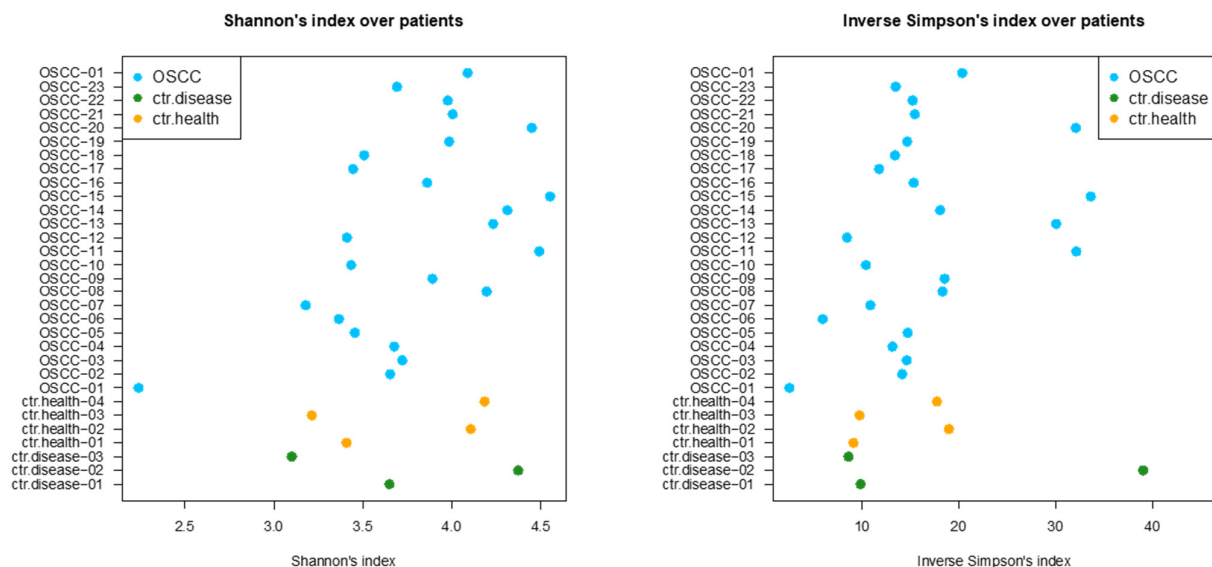

Supplementary Figures 2b. Class diversity indices over patients.

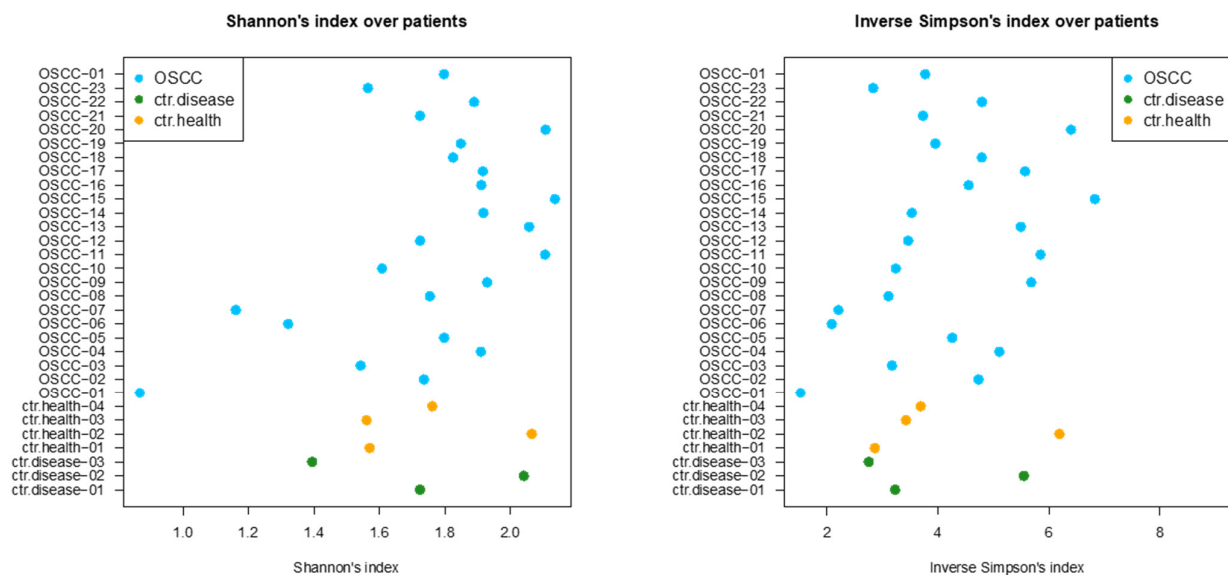

Supplementary Figure 3. Hierarchical clustering over patients.

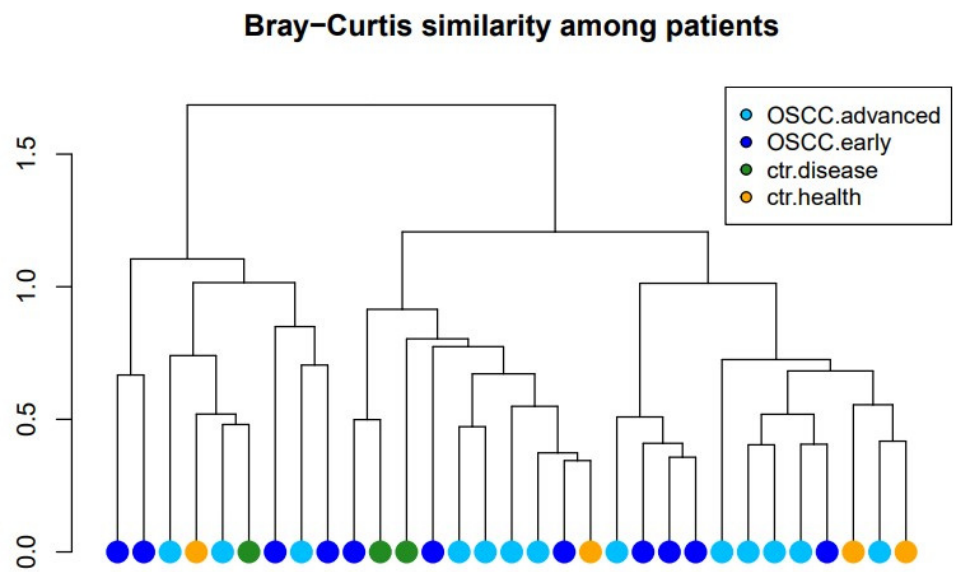

Supplementary Figure 4a. Organism overlaps among groups.

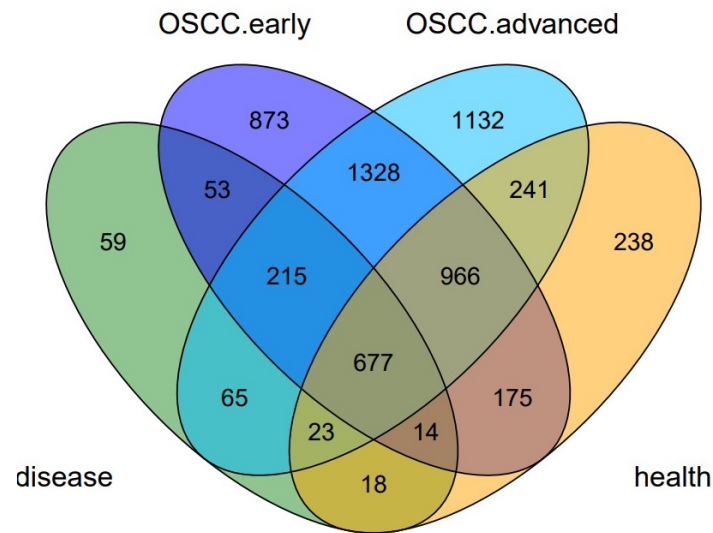

**Supplementary Figure 4b.** Class overlaps among groups.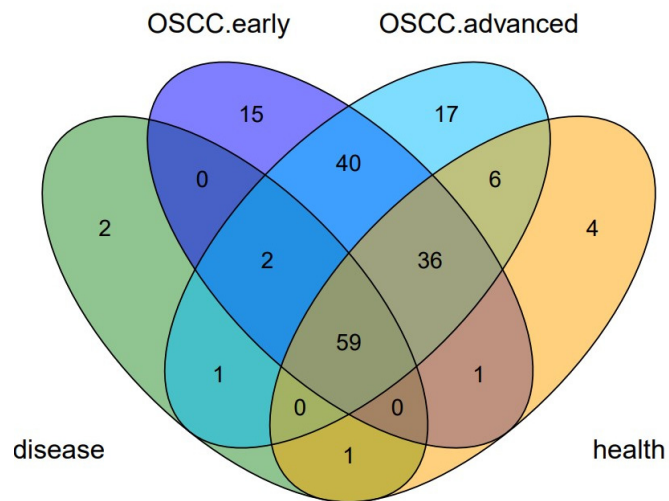

Supplement: s1 [file s1]
